# Supplementary material for: Hierarchical structural designs of ion exchange membranes for flow batteries
Source: Royal Society of Chemistry journal article supplement (doi:10.1039/c8ta11974k), 2019-01-01
Supplement: c8ta11974k1.pdf [file c8ta11974k1.pdf]

## Supporting Information

### **Hierarchical structural designs of ion exchange membranes for flow batteries**

*Xiujun Yue, Qian He, Hee-Dae Lim, and Ping Liu\**

Department of Nanoengineering, University of California San Diego, La Jolla, CA  
92093, USA

\*E-mail: [piliu@eng.ucsd.edu](mailto:piliu@eng.ucsd.edu)

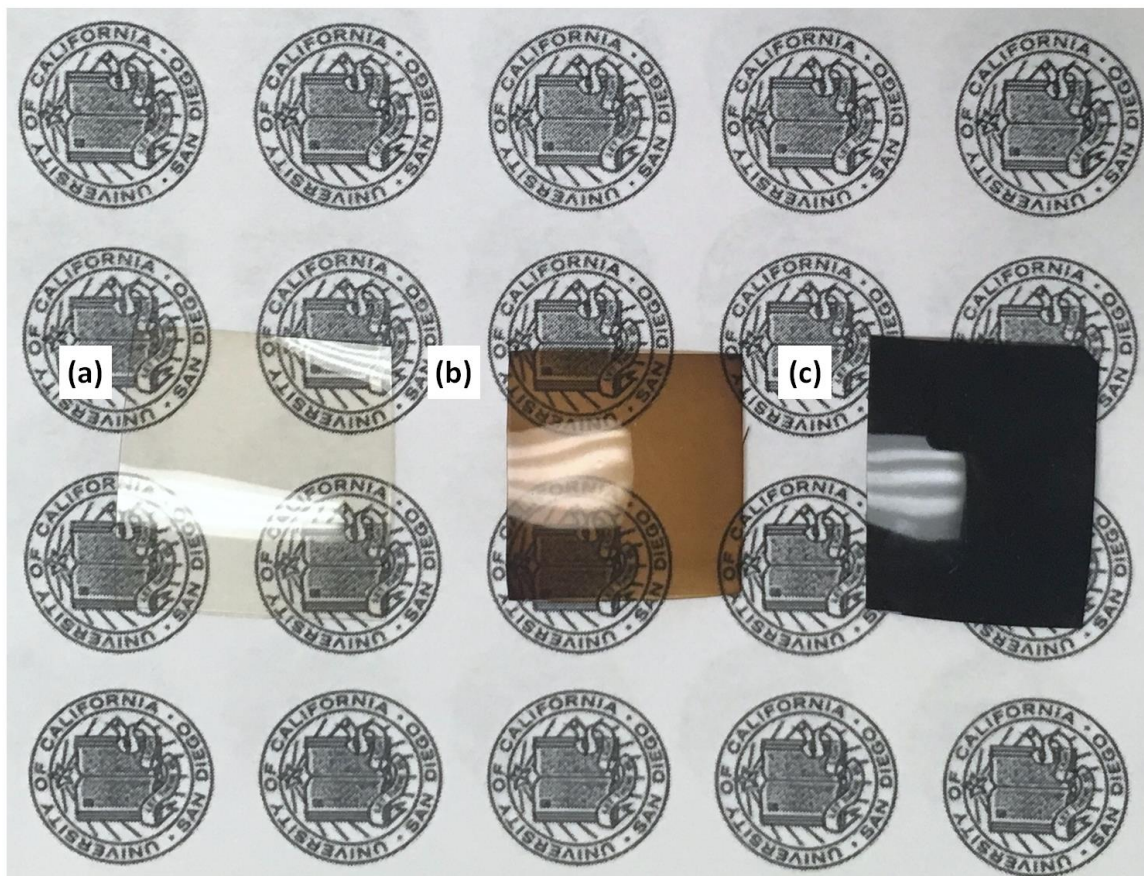

Figure S1. Photo of (a) Blank Nafion; (b) h-DNf/oxide; (c) c-DNf/oxide.

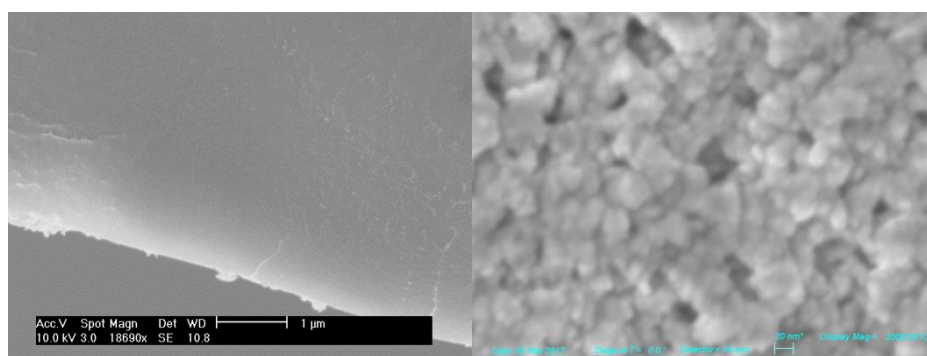

Figure S2. SEM images: (a) cross section of DNf; (b) ultra-high magnification surface of h-DNf/oxide.

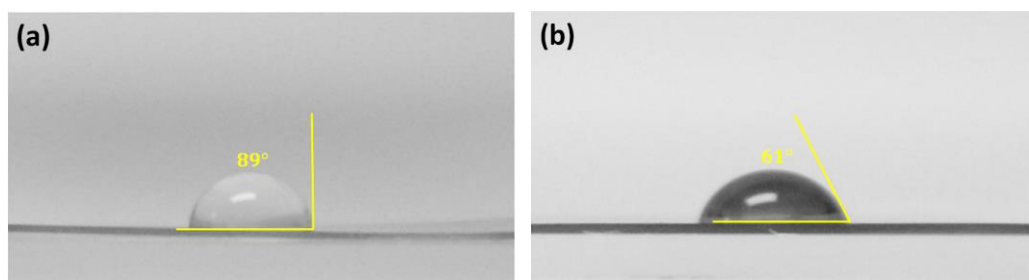

Figure S3. Contact angles of (a) Blank Nafion; (b) DNf.

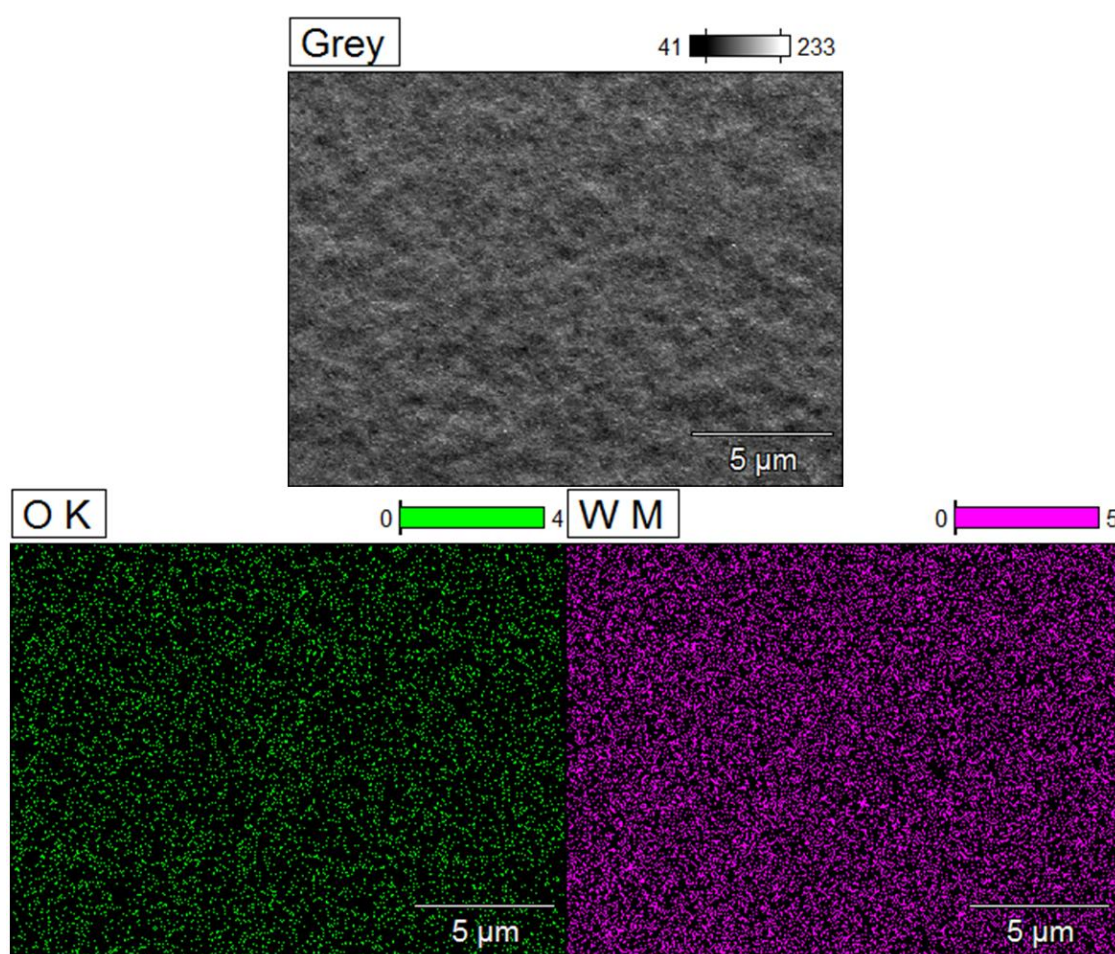

Figure S4. Surface EDX of h-DNf/oxide.



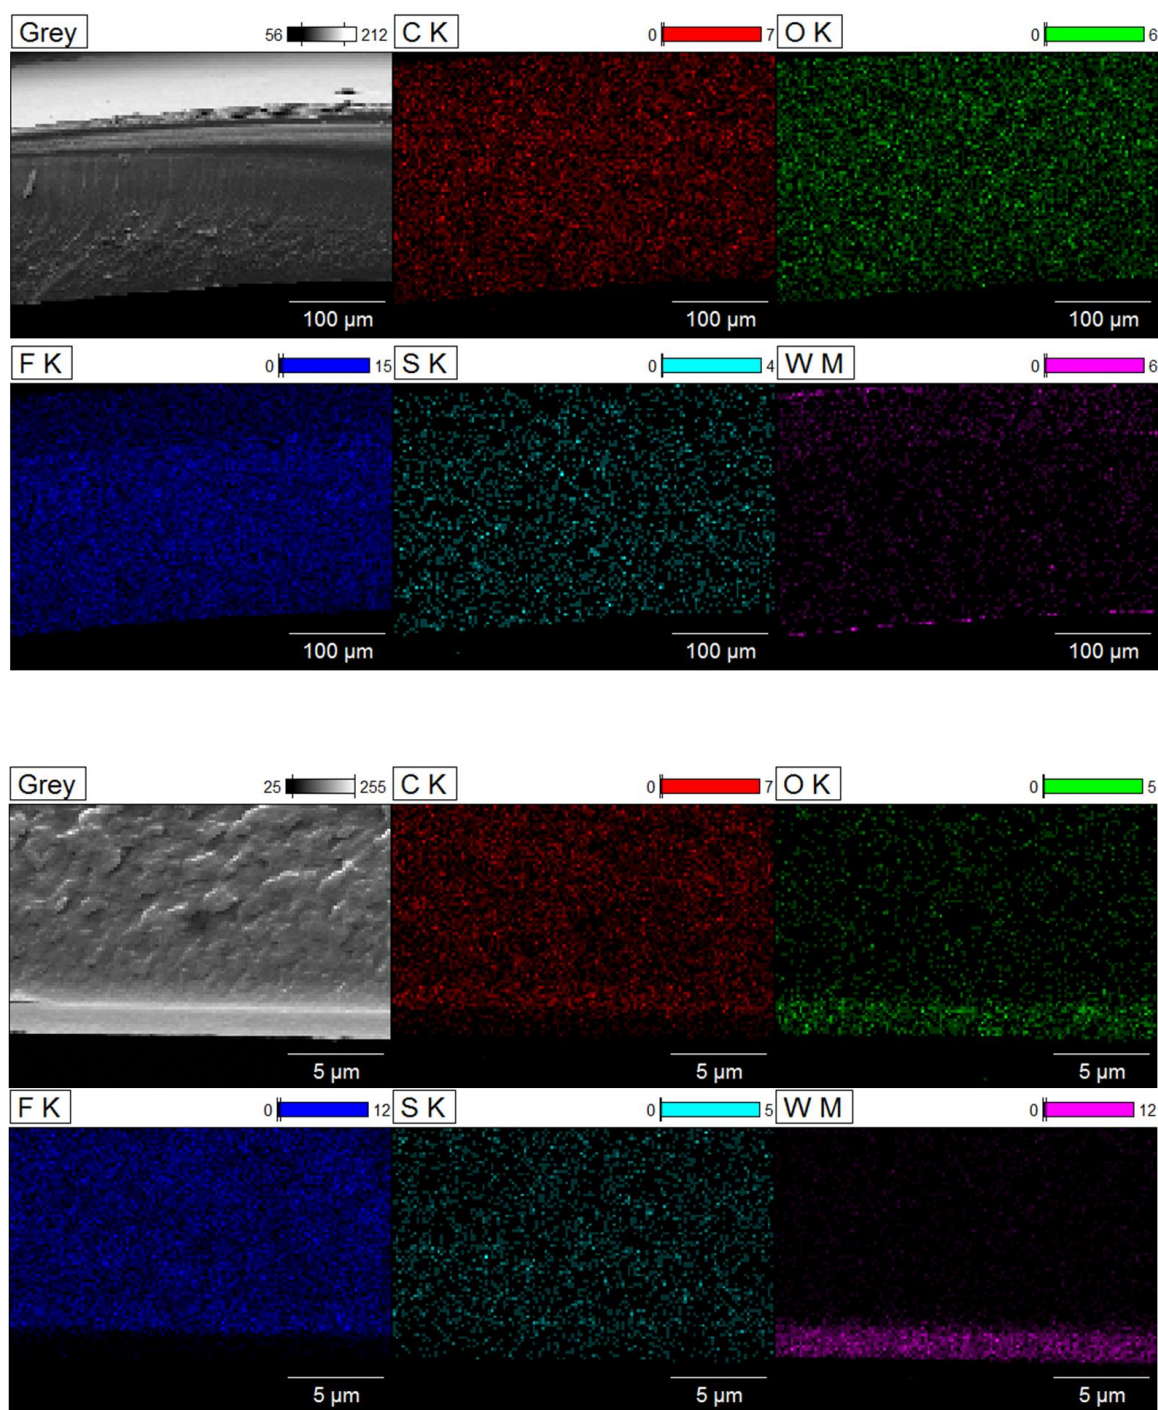

Figure S5. Surface EDX of h-DNf/oxide: (a) low magnification; (b) high magnification.

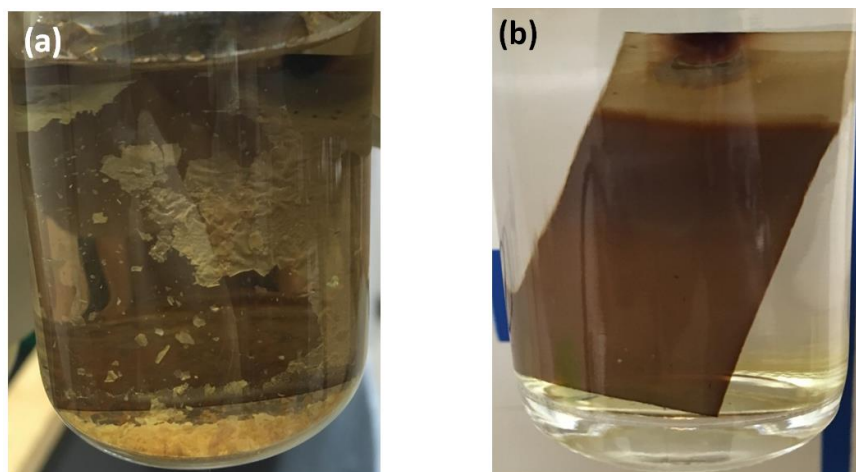

Figure S6. Stability of coating layer: (a) l-DNf/oxide soaked in DI water for 24 hours; (b) h-DNf/oxide soaked in DI water for 1 week.

Table S1. Mechanical properties of Nafion and h-DNf/oxide.

|                 | Young's modulus | Yield stress | Yield strain | Ultimate stress | Ultimate strain |
|-----------------|-----------------|--------------|--------------|-----------------|-----------------|
|                 | [Mpa]           | [Mpa]        | [%)]         | [Mpa]           | [%]             |
| Nafion-dry      | 142.5           | 7.67         | 8.5          | 25.9            | 223.3           |
| Nafion-wet      | 35.5            | 4.95         | 22.0         | 20.4            | 233.4           |
| h-DNf/oxide-wet | 148.7           | 9.29         | 9.1          | 17.0            | 47.3            |

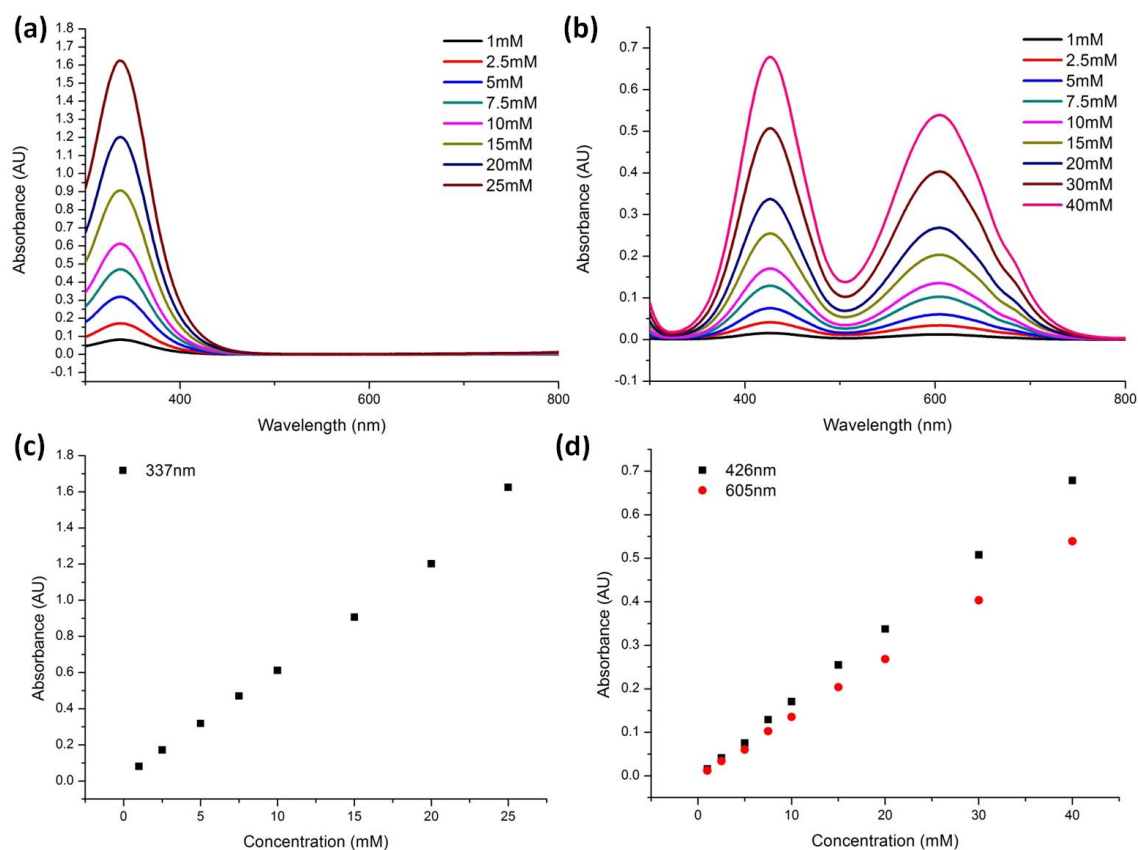

Figure S7. UV-vis on standard samples (a) UV-vis spectrums on  $\text{Fe}^{2+}$  standard samples; (a) UV-vis spectrums on  $\text{Cr}^{3+}$  standard samples; (c) concentration-absorbance standard curve of  $\text{Fe}^{2+}$ ; (d) concentration-absorbance standard curve of  $\text{Cr}^{3+}$ .

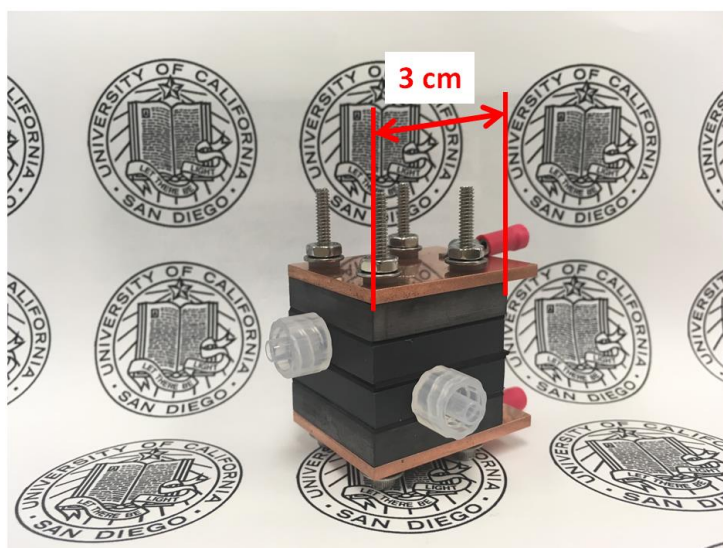

Figure S8. Photo of a flow battery hardware designed and fabricated in house.

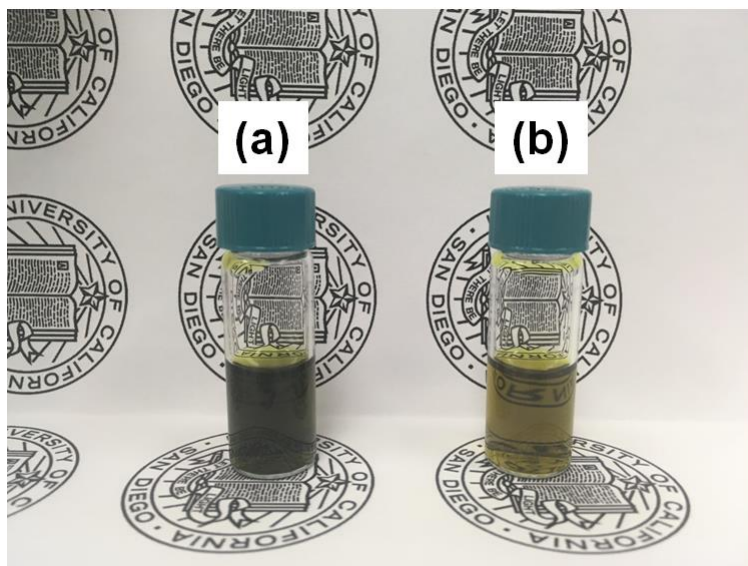

Figure S9. Photo of catholytes of flow batteries after cycling for 50 hours at the current density of  $20 \text{ mA cm}^{-2}$  and the flow rate of  $5 \text{ ml min}^{-1}$ : (a) Nafion, (b) h-DNf/oxide.

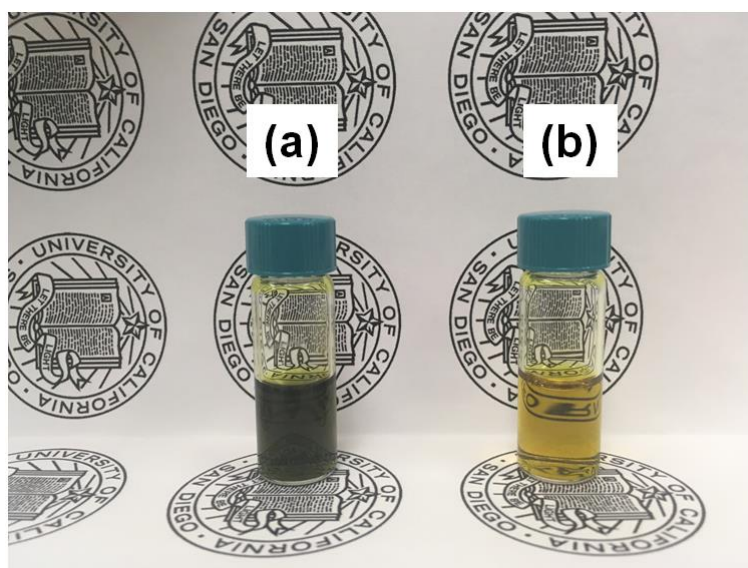

Figure S10. Photo of catholytes of flow batteries with no applied current density after 70 hours at the flow rate of  $5 \text{ ml min}^{-1}$ : (a) Nafion, (b) h-DNf/oxide.



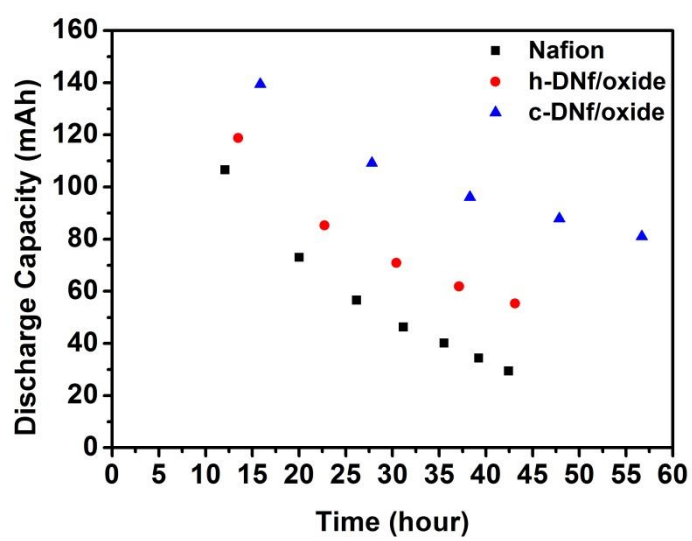

Figure S11. Capacity retention over time.
